# Supplementary material for: Christensenella minuta DSM 22607 and food restriction manage age-related disorders in vivo
Source: Research Square preprint supplement (doi:10.21203/rs.3.rs-7463004/v1), 2025-09-11
Supplement: Supplementary file 1 [file 7f3a2bfa47dd96e10e9e490d.docx]

**Supplementary data**

Figure S1. **Aging protocol**


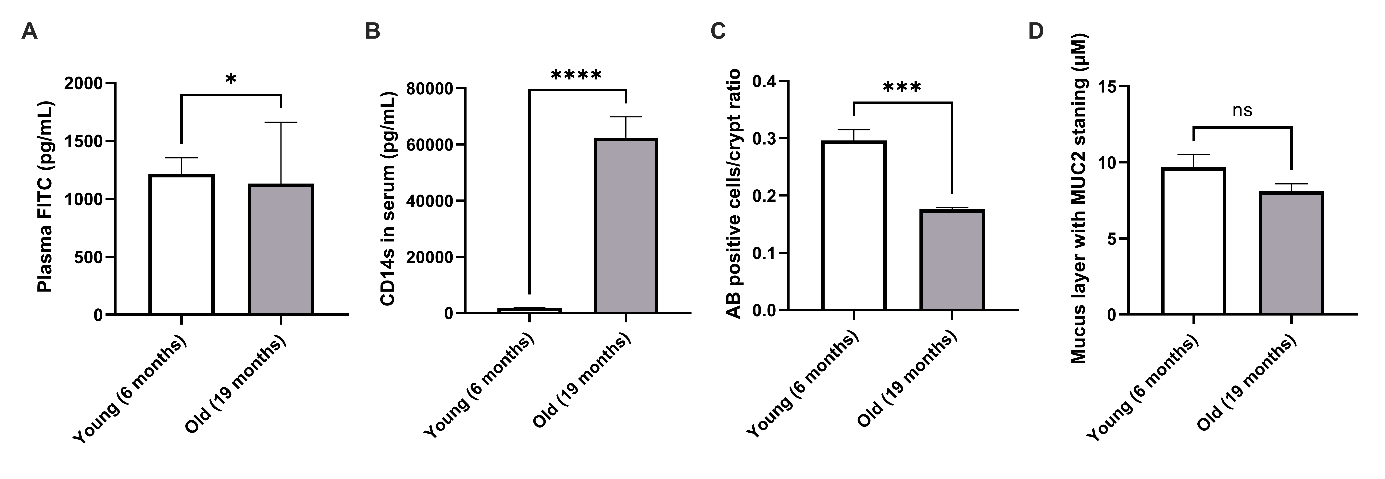


Figure S2. **Permeability and mucus production comparison in young vs old mice**

FITC-Dextran (A) and CD14s (B) in serum measured at T5, AB positive cells (C) and mucus production (D).

Results of t-test student followed by a Mann Whitney test comparing young (6 months) and old (19 months) mice.

*p < 0.05, **p < 0.01, ***p < 0.001, ****p < 0.0001.

Figure S3. **Assessment of intestinal permeability in serum**

FITC-Dextran in serum (A) measured at each month and CD14s in serum at T5 (B).

Results of two-way anova followed by a Tukey’s multiple comparison test comparing all groups.

*p < 0.05, **p < 0.01, ***p < 0.001, ****p < 0.0001.


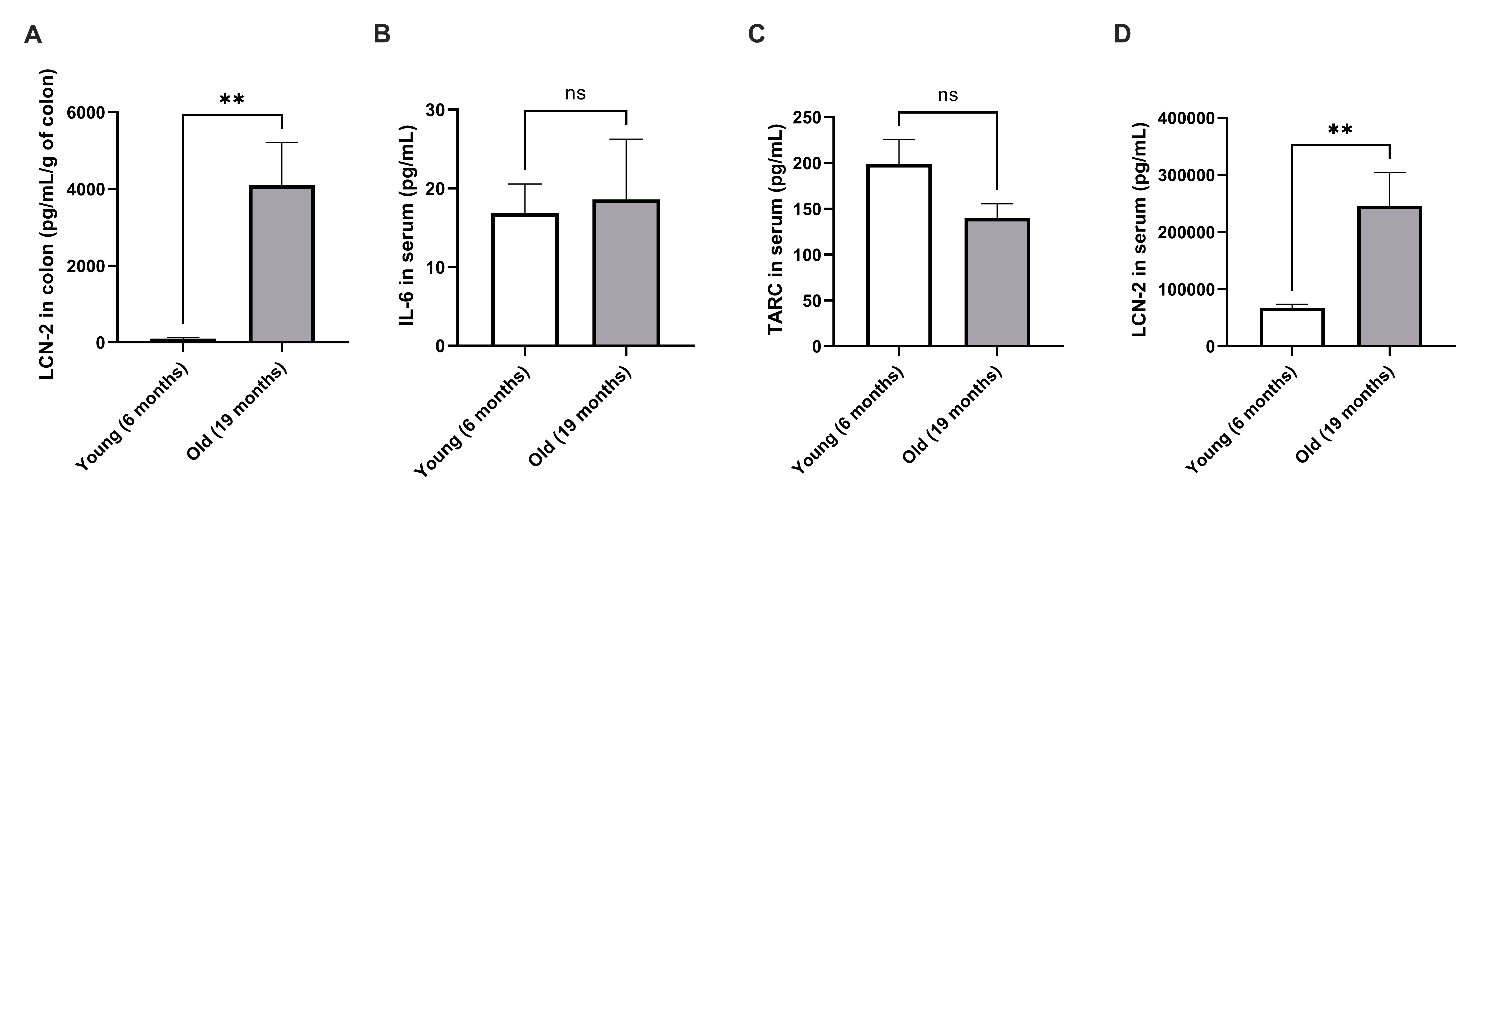


Figure S4. **Comparison between young and old mice inflammatory response in colon and serum**

LCN-2 in colon (A); IL-6 (B), TARC (C) and LCN-2 (D) cytokines in serum.

Results of t-test student followed by a Mann Whitney test comparing young (6 months) and old (19 months) mice.

*p < 0.05, **p < 0.01, ***p < 0.001, ****p < 0.0001.


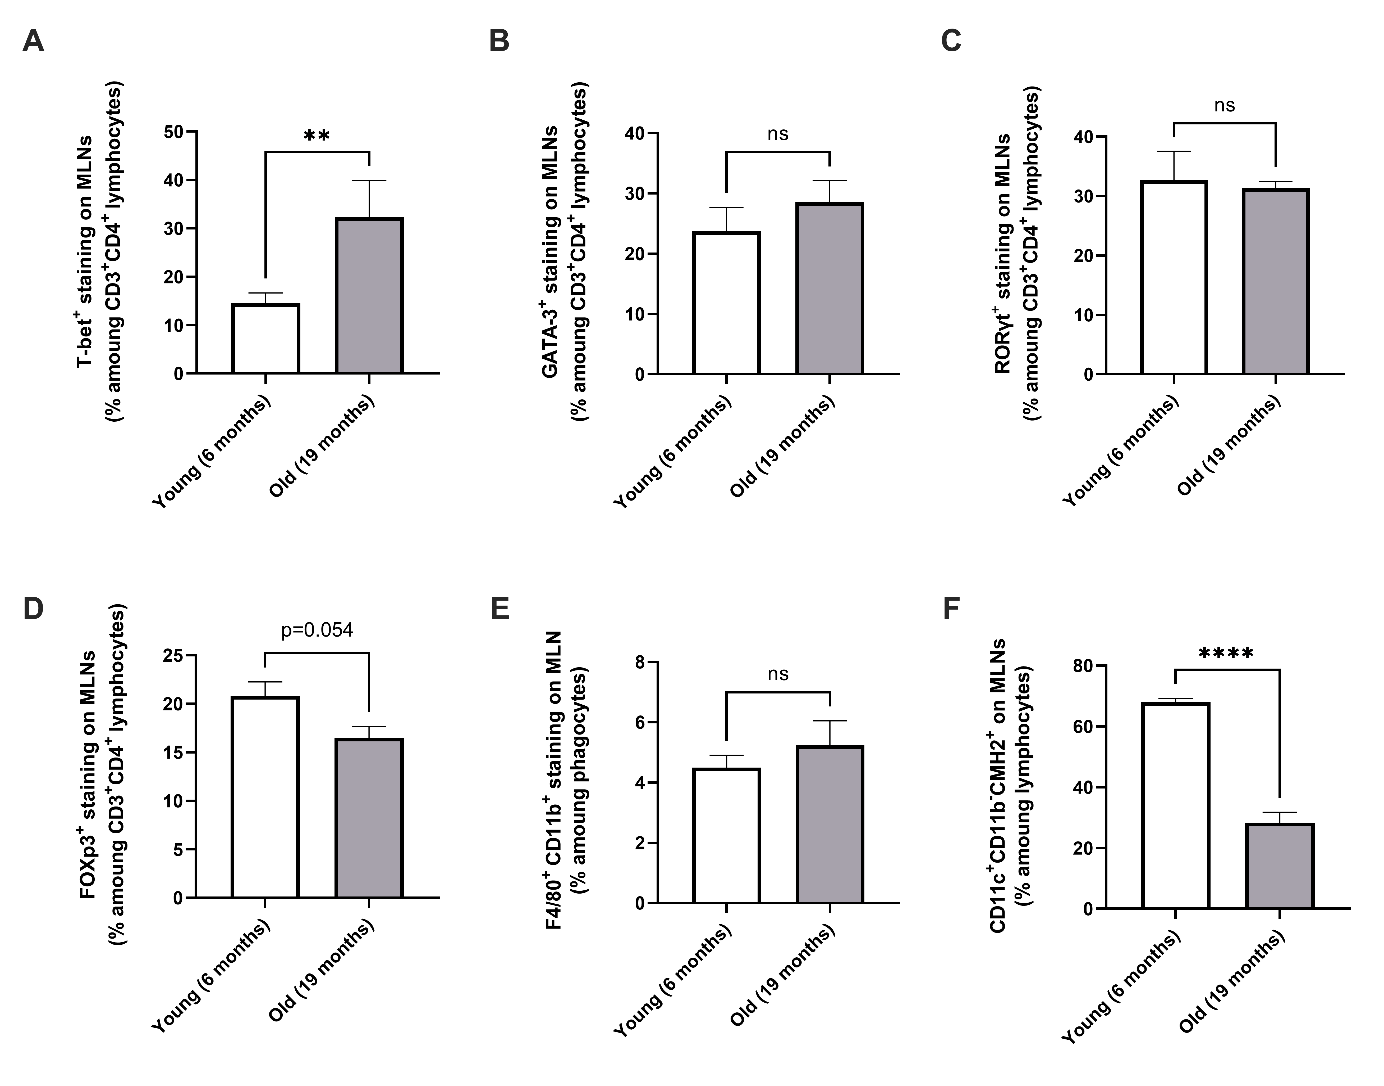


Figure S5. **Adaptative et innate immune system at systemic levels on MLNs**

Th1 (A), Th2 (B), Th17 (C), Treg (D) population; macrophages (E) and DCs (F) staining on MLN lymphocyte and phagocyte cells.

Results of t-test student followed by a Mann Whitney test comparing young (6 months) and old (19 months) mice.

*p < 0.05, **p < 0.01, ***p < 0.001, ****p < 0.0001.

Figure S6. **NK cells in MLNs**

Precursor stage of NK cells (A); total (B), immature (C), early mature (D), terminally mature (E) NK cells; B cells (F) staining in MLNs.

Results of t-test student followed by a Mann Whitney test comparing young (6 months) and old (19 months) mice.

*p < 0.05, **p < 0.01, ***p < 0.001, ****p < 0.0001.


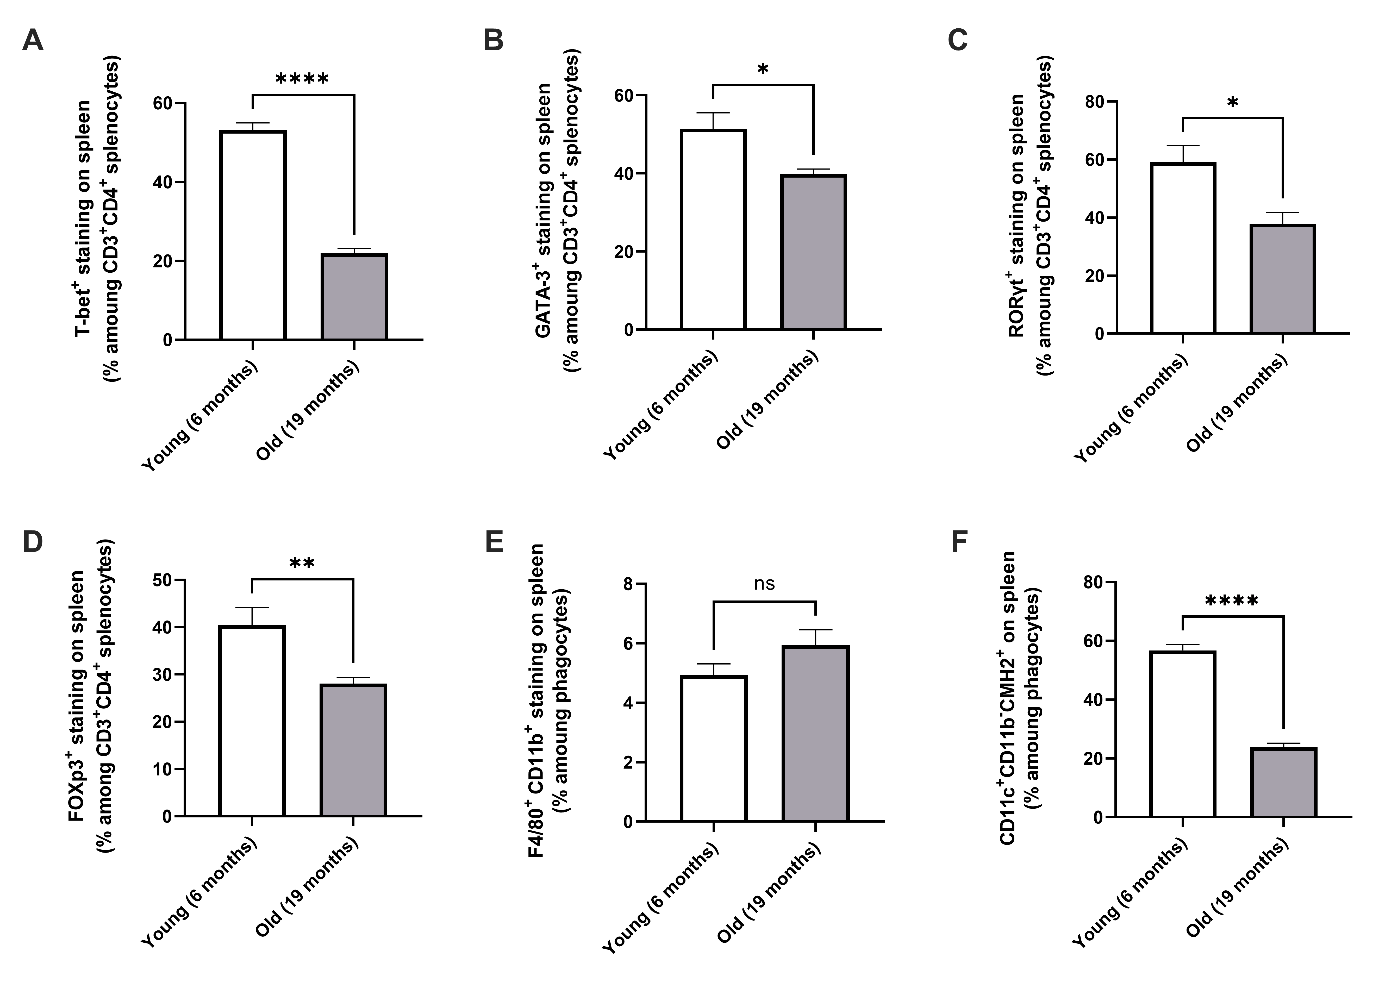


Figure S7. **Adaptative and innate staining on young and old mouse splennocytes**

Th1 (A), Th2 (B), Th17 (C), Treg (D) population; macrophages (E) and DCs (F) staining on splennocytes.

Results of t-test student followed by a Mann Whitney test comparing young (6 months) and old (19 months) mice.

*p < 0.05, **p < 0.01, ***p < 0.001, ****p < 0.0001.

Figure S8. **NK cell maturation modifications between young and old mice in splennocytes**

Precursor stage of NK cells (A); total (B), immature (C), early mature (D), terminally mature (E) NK cells; B cells (F) staining in spleen.

Results of t-test student followed by a Mann Whitney test comparing young (6 months) and old (19 months) mice.

*p < 0.05, **p < 0.01, ***p < 0.001, ****p < 0.0001.

**B**

**A**


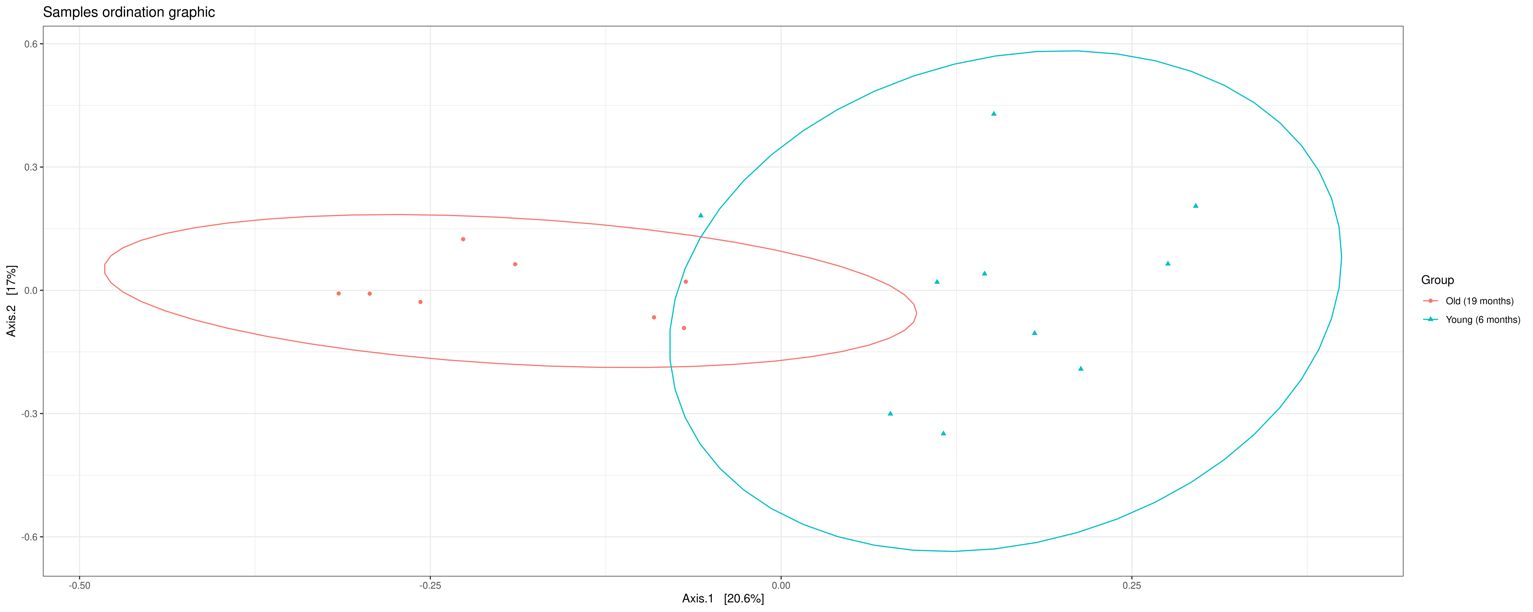


Figure S9. **- and - diversity in gut microbiota population between young and old mice**

Shannon index (p=0.044, *) (A) and bray-curtis dissimilarity (p=0.003, ***) (B) diversity in the gut microbiota.

Results of one-way anova performed in Easy16S software.

*p < 0.05, **p < 0.01, ***p < 0.001, ****p < 0.0001.


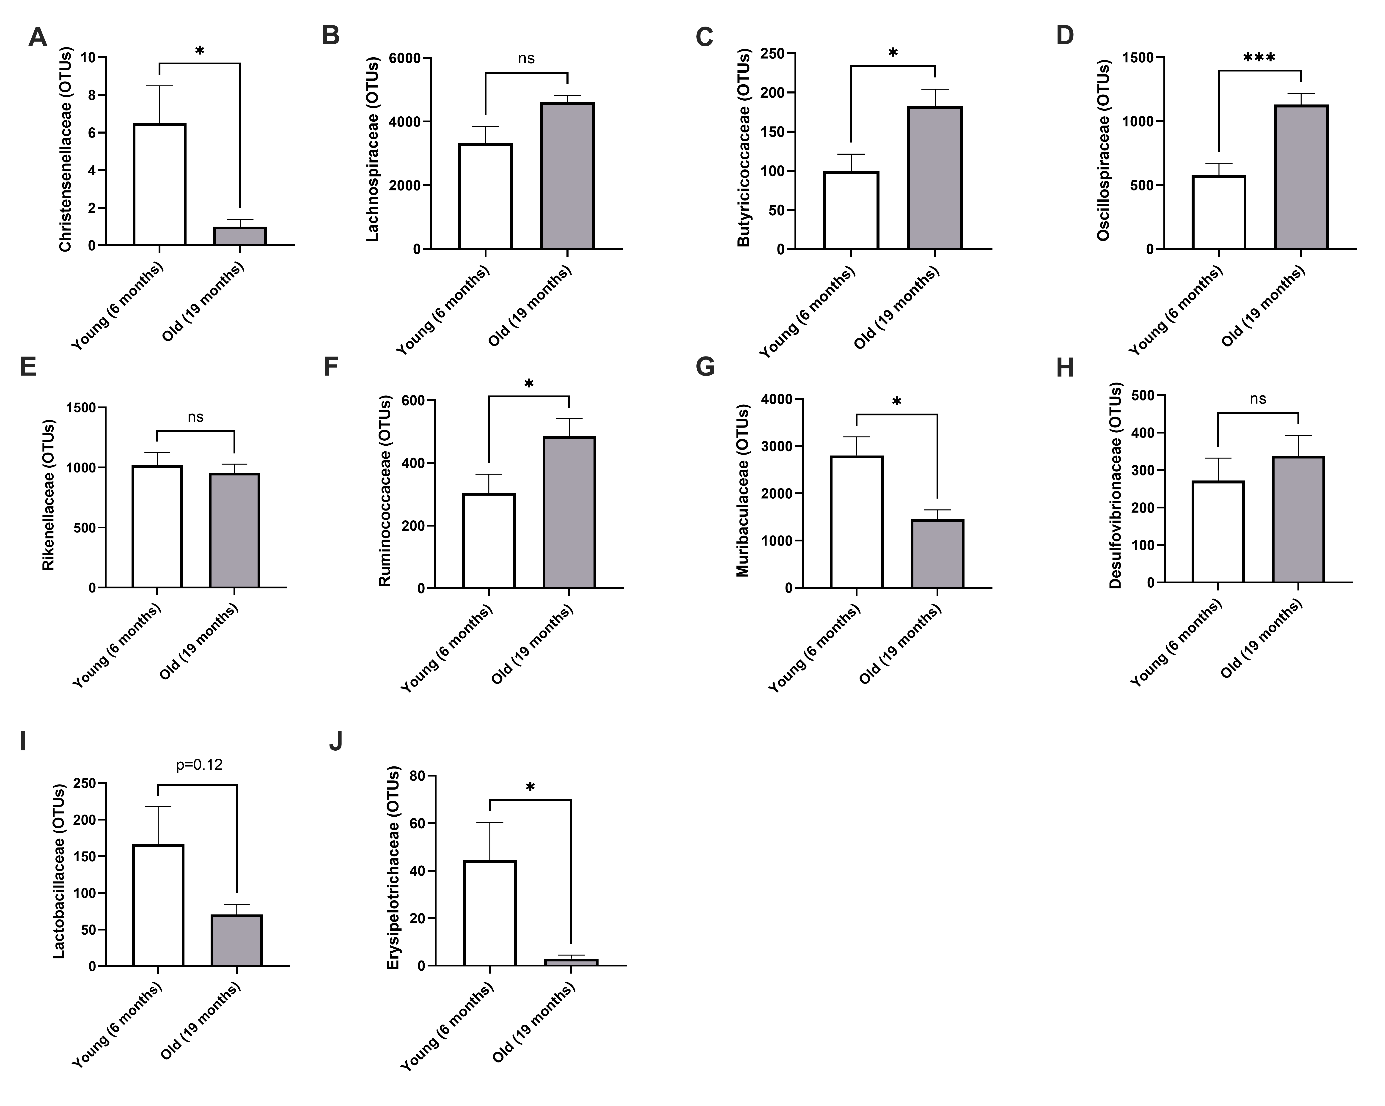


Figure S10. **Microbiota differences between young and old mice**

Christensenellaceae (A), Lachnospiraceae (B), butyricicoccaceae (C), Muribaculaceae (D), Rikenellaceae (E), Desulfovibrionaceae (F), Oscillospiraceae(G), Lactobacillaceae (H), Erysipelotrichaceae (I) and Ruminococcaceae (J) families in feces at T5.

Results of t-test student followed by a Mann Withney test comparing young (6 months) and old (19 months) mice.

*p < 0.05, **p < 0.01, ***p < 0.001, ****p < 0.0001.


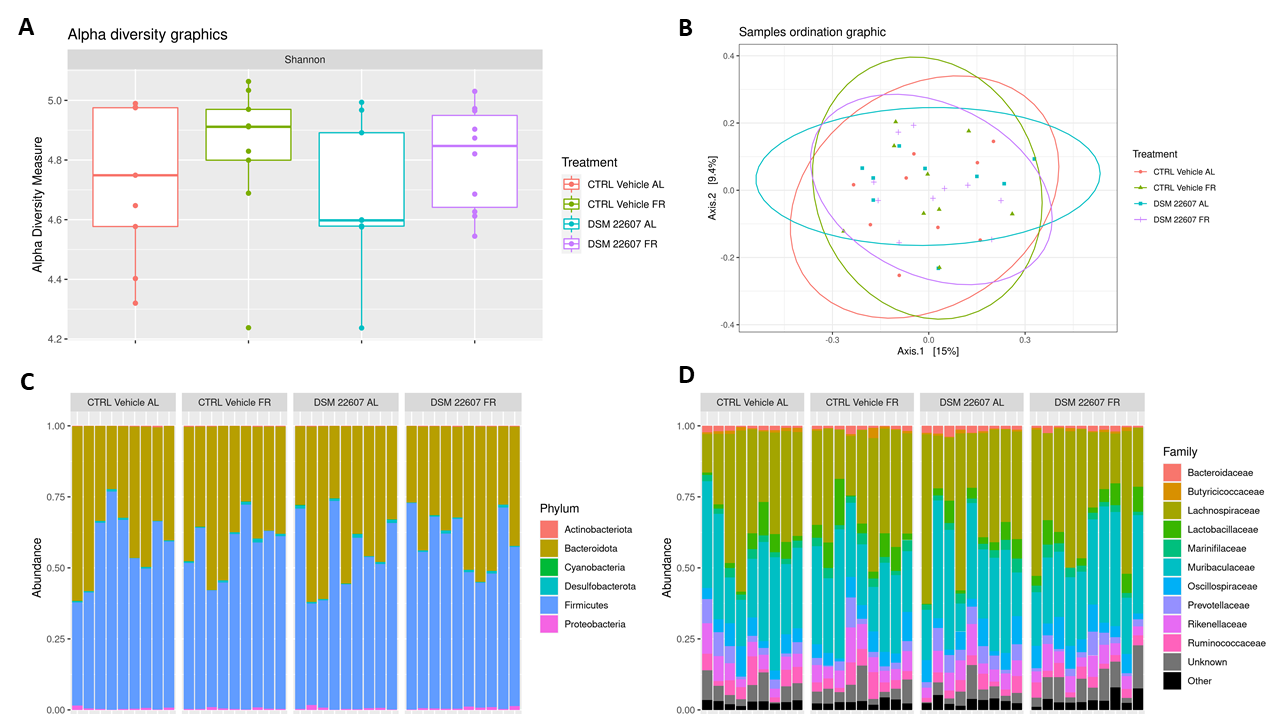


Figure S11. **Gut microbiota differences at the beginning of the experiment**

-diversity measure with Shannon index (A); -diversity with Bray-curtis measure (B); phylum (C) and family abundance (D) in feces at T0.

Results of two-way anova followed by a Tukey’s multiple comparison test comparing all groups.

*p < 0.05, **p < 0.01, ***p < 0.001, ****p < 0.0001


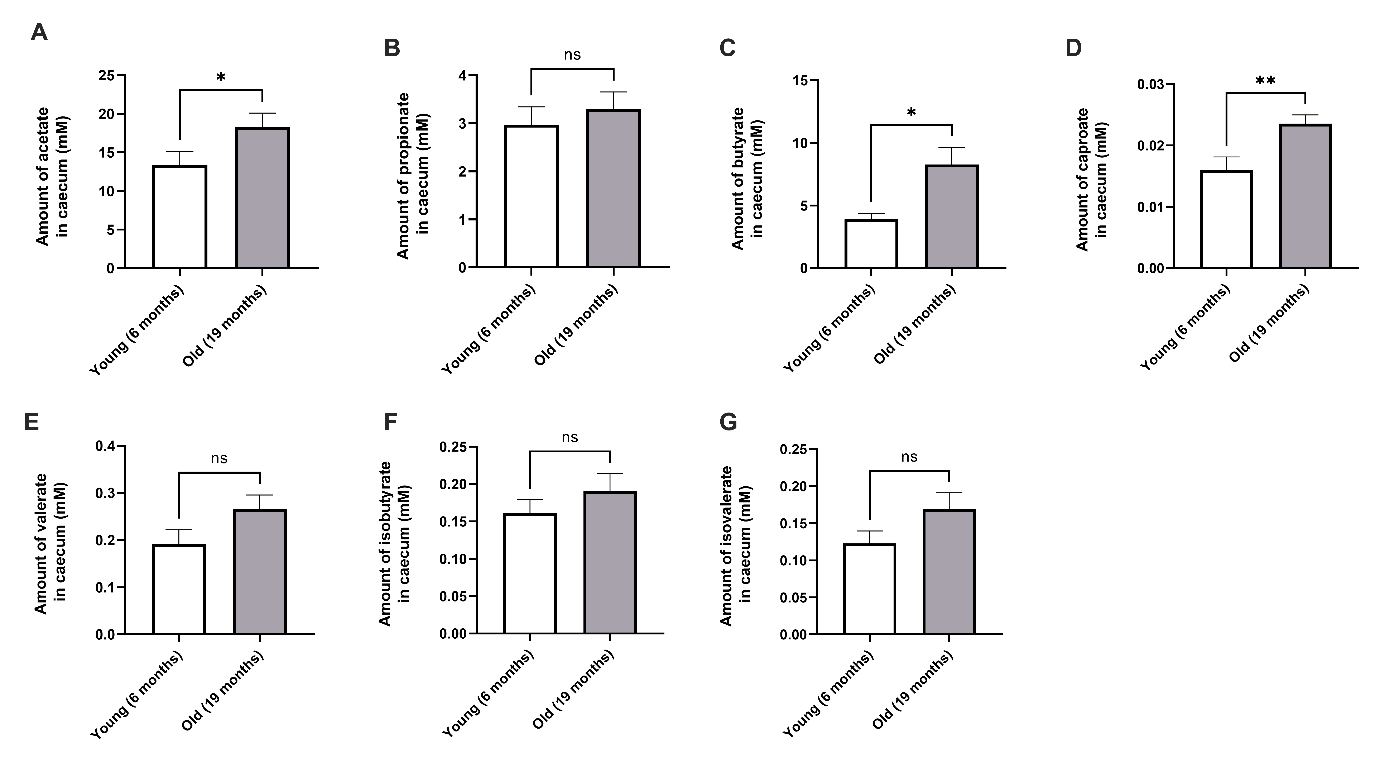


Figure S12. **Amount of SCFAs in caecum between young and old mice**

Acetate (A), propionate (B), butyrate (C), caproate (D), valerate (E), isobutyrate (F) and isovalerate (G) in caecum.

Results of t-test student followed by a Mann Whitney test comparing young (6 months) and old (19 months) mice.

*p < 0.05, **p < 0.01, ***p < 0.001, ****p < 0.0001.


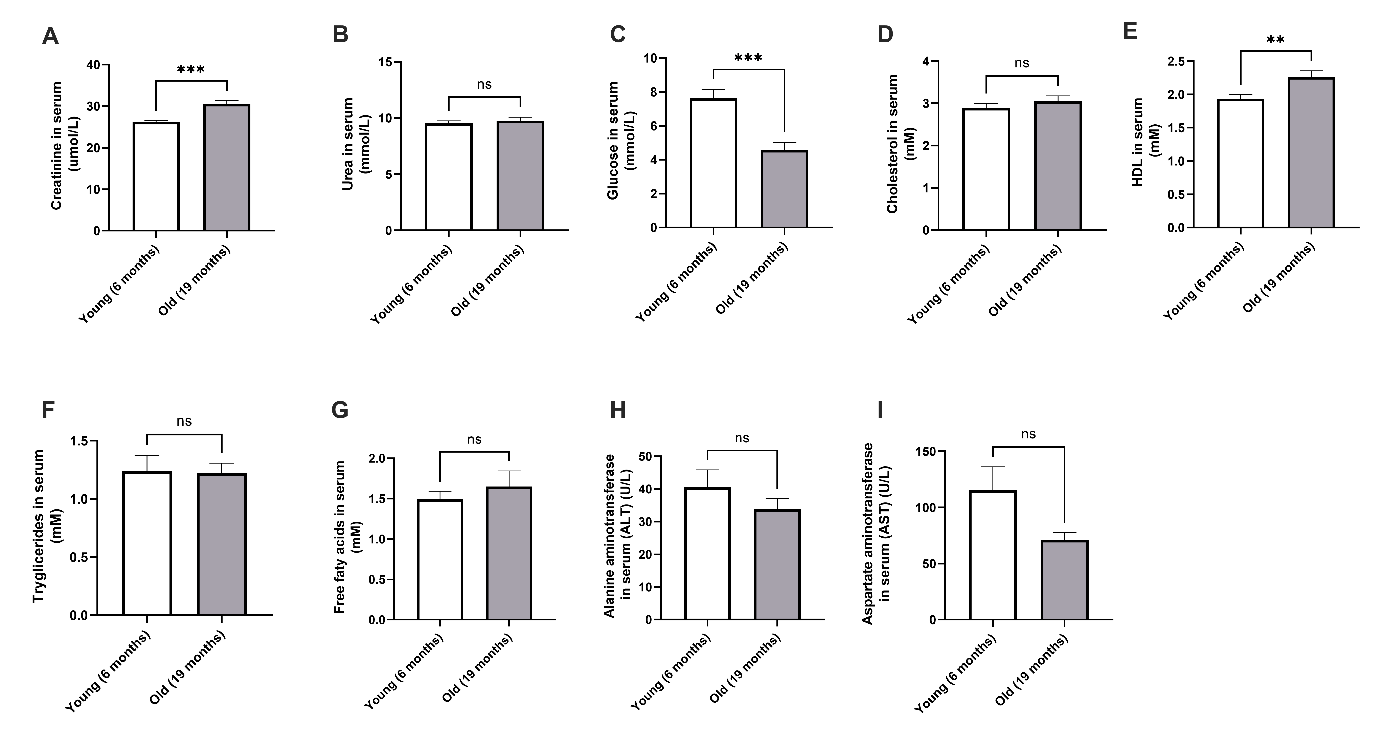


Figure S13. **Metabolic parameter differences between young and old mice**

Creatinine (A), urea (B), glucose (C), cholesterol (D), HDL (E), triglyceride (F), free fatty acids (G), ALT (H) and AST (I) in serum.

Results of t-test student followed by a Mann Whitney test comparing young (6 months) and old (19 months) mice.

*p < 0.05, **p < 0.01, ***p < 0.001, ****p < 0.0001.


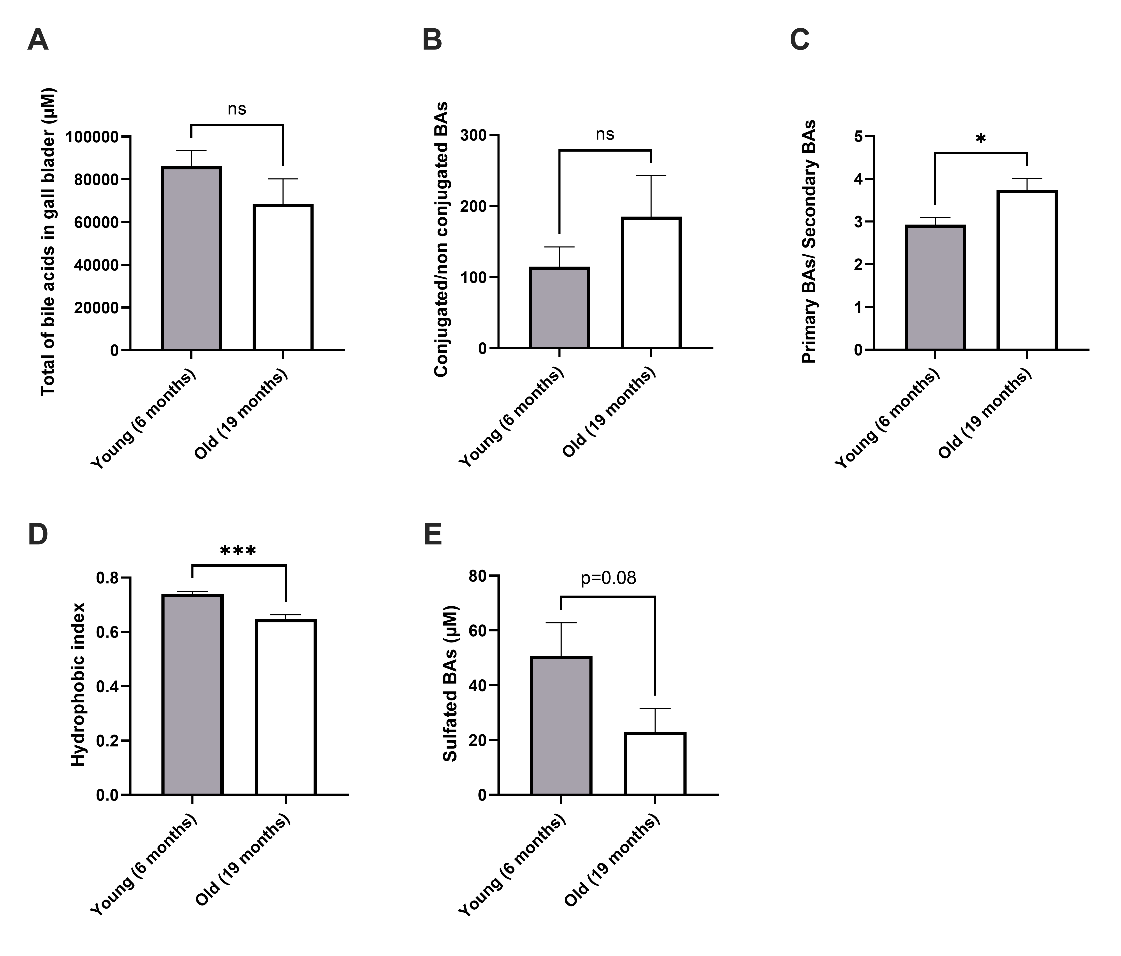


Figure S14. **BA composition in gallbladder between young and old mice**

Total BA (A), conjugated to non-conjugated BA ratio (B), primary to secondary BA ratio (C), hydrophobic index (D) and sulfated BAs (E) in gallbladder after 3.30 hours of fasting.

Results of t-test student followed by a Mann Whitney test comparing young (6 months) and old (19 months) mice.

*p < 0.05, **p < 0.01, ***p < 0.001, ****p < 0.0001.
